# Supplementary material for: Transdermal delivery of poly-hyaluronic acid-based spherical nucleic acids for chemogene therapy
Source: Royal Society of Chemistry journal article supplement (doi:10.1039/d1nr06353g), 2021-12-20
Supplement: d1nr06353g1.pdf [file d1nr06353g1.pdf]

## Supplementary Information

### Transdermal Delivery of Poly-Hyaluronic Acid-Based Spherical Nucleic Acids for Chemogene Therapy

*Kai Jiang<sup>a, #</sup>, Di Zhao<sup>b, #</sup>, Rui Ye<sup>a</sup>, Xinlong Liu<sup>c</sup>, Chao Gao<sup>a</sup>, Yuanyuan Guo<sup>c</sup>,  
Chuan Zhang<sup>c</sup>, Jian Zeng<sup>d</sup>, Shi Wang<sup>d</sup> and Jie Song<sup>a, d, \*</sup>*

<sup>a</sup> Institute of Nano Biomedicine and Engineering, Department of Instrument Science and Engineering, School of Electronic Information and Electrical Engineering, Shanghai Jiao Tong University, 800 Dongchuan Road, Shanghai, 200240, People's Republic of China.

<sup>b</sup> School of Perfume and Aroma Technology, Shanghai Institute of Technology, Shanghai 201418, People's Republic of China

<sup>c</sup> School of Chemistry and Chemical Engineering, Frontiers Science Center for Transformative Molecules, State Key Laboratory of Metal Matrix Composites, Shanghai Jiao Tong University, 800 Dongchuan Road, Shanghai, 200240, People's Republic of China

<sup>d</sup> Institute of Cancer and Basic Medicine (ICBM), Chinese Academy of Sciences; The Cancer Hospital of the University of Chinese Academy of Sciences, Hangzhou, Zhejiang 310022, People's Republic of China.

# These authors contributed equally.

\* Corresponding Authors: J. S. [sjie@sjtu.edu.cn](mailto:sjie@sjtu.edu.cn)

Keywords: spherical nucleic acid, oligonucleotide therapy, hypertrophic scars, transdermal delivery, combined therapy

|          | sequence              |
|----------|-----------------------|
| HPRT1 F  | TGAGGATTTGGAAAGGGTGT  |
| HPRT1 R  | GAGCACACAGAGGGCTACAA  |
| TIMP-1 F | CATTGCTGGAAAAGTGCAGGA |
| TIMP-1 R | TCCACAAGCAATGAGTGCCA  |

Stable 1. DNA sequence used in the present study.

## Figures

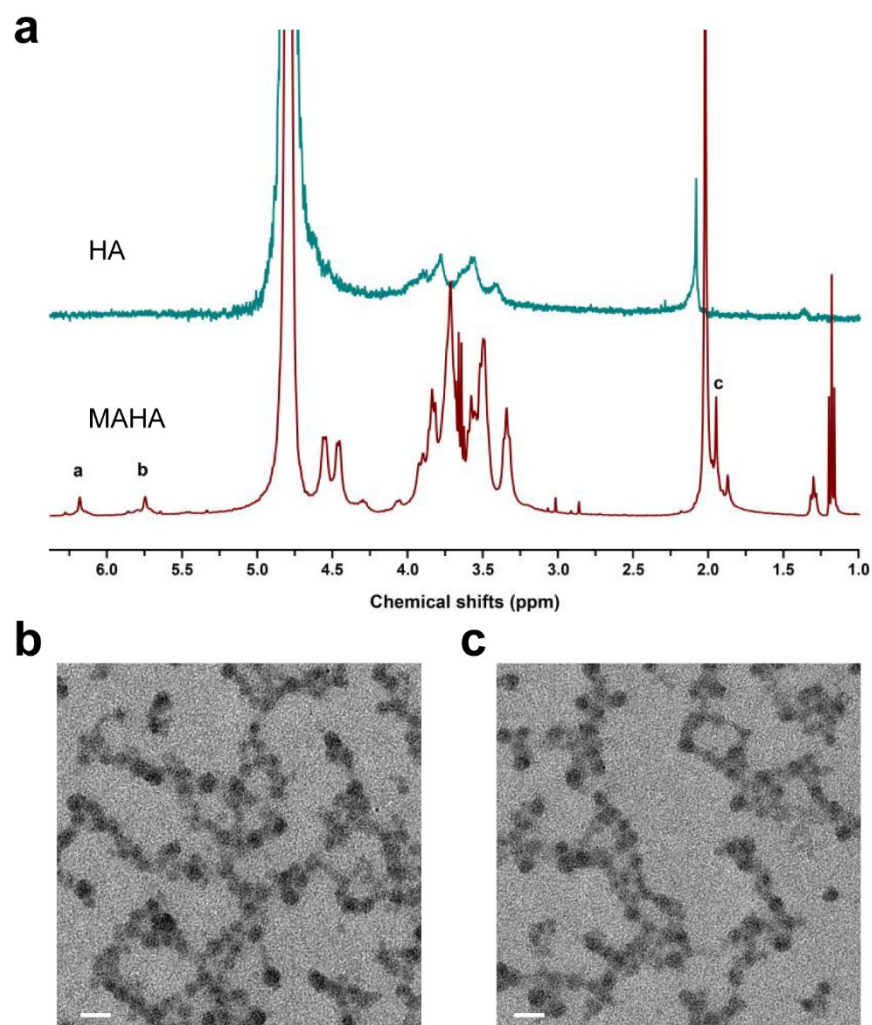

Fig. S1.  $^1\text{H}$  NMR spectrum of HA and MAHA (a) and TEM images of PHAAD nanoparticles (b) and PHAAR nanoparticles (c), scale bar: 100 nm.

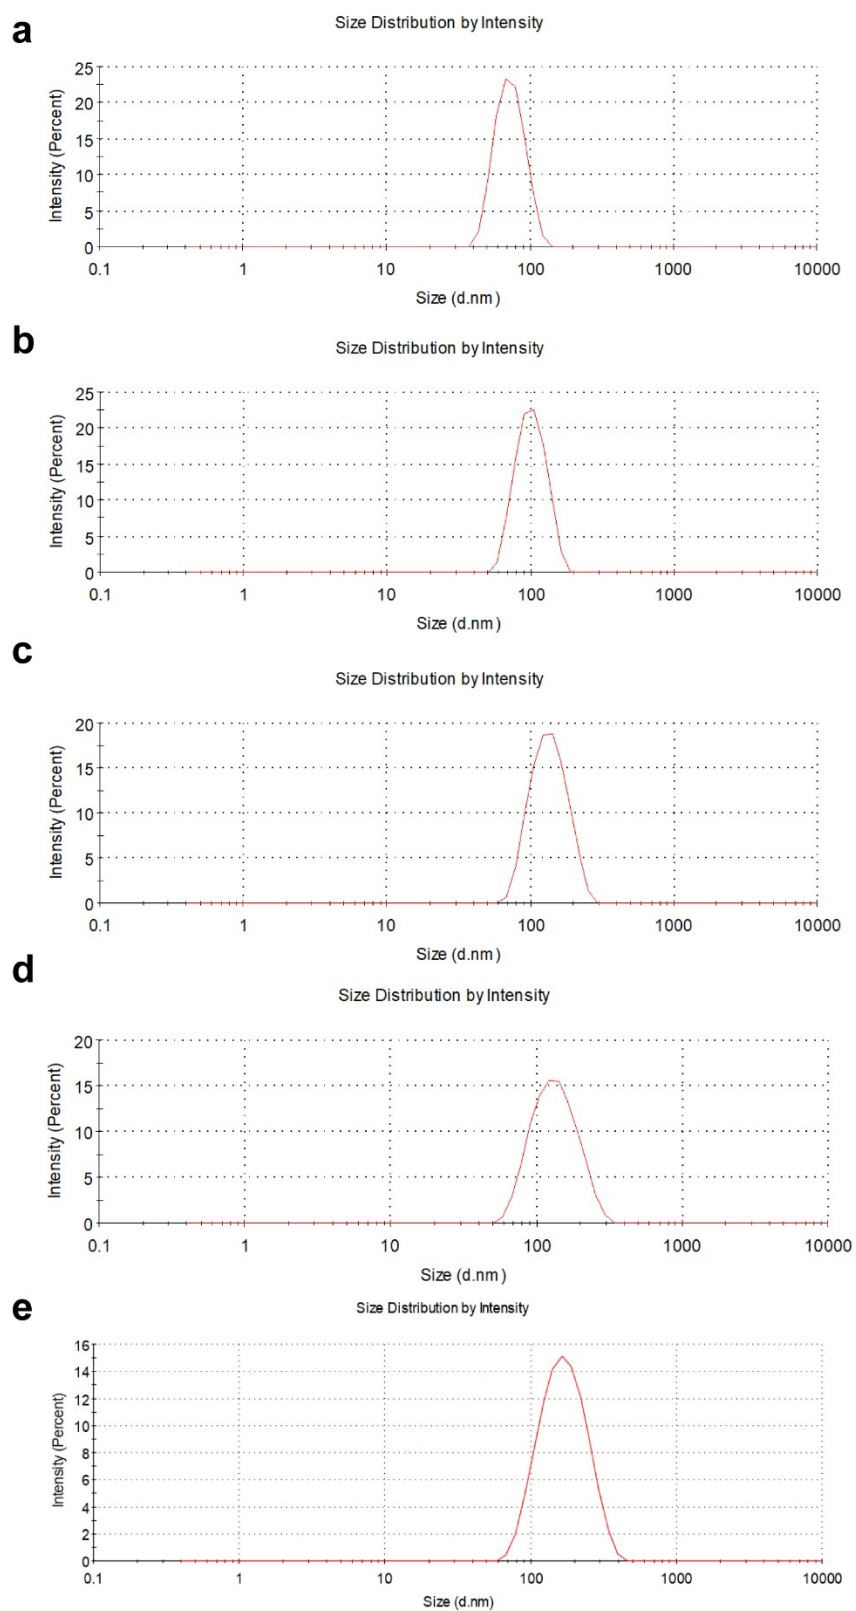

Fig. S2. Size distribution of PHA nanoparticles (a), PHA-N<sub>3</sub> nanoparticles (b), PHAA nanoparticles (c), PHAAD nanoparticles (d) and PHAAR nanoparticles (e).

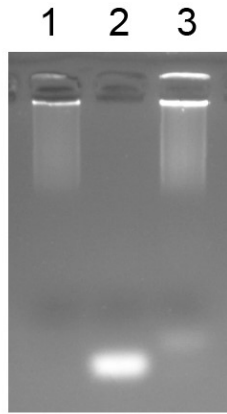

Fig. S3. The 1% agarose gel electrophoresis image. (1:PHA, 2:TIMP-1 ASO, 3:PHAA)

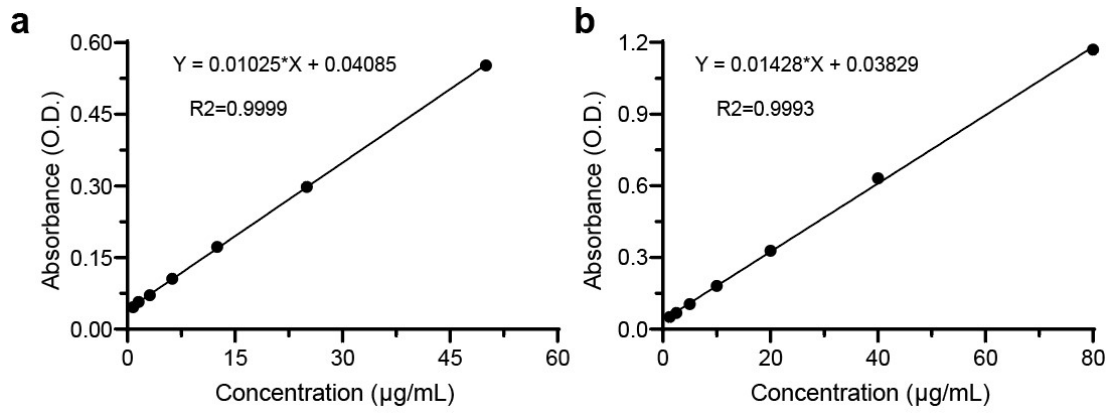

Fig. S4. Standard curve lines of DOX:0~50µg/mL (a) and RB:0~80µg/mL (b).

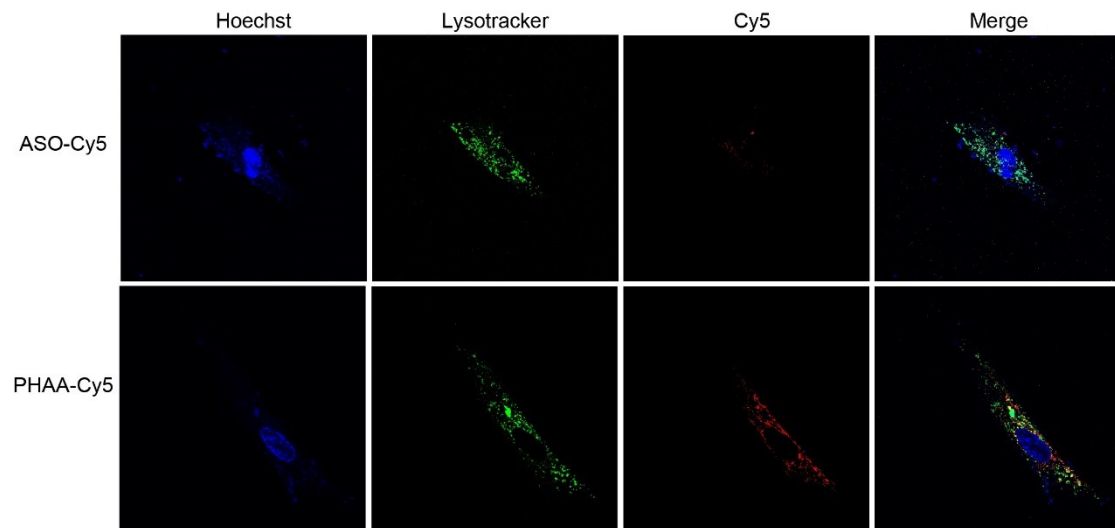

Fig. S5. Fluorescence images of lysosomes and PHAA-Cy5 nanoparticles distribution.

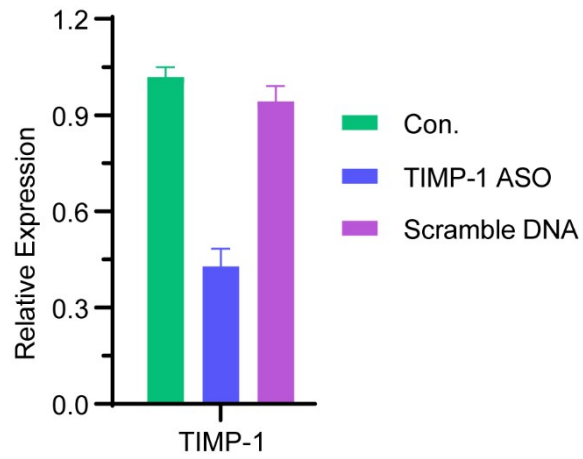

Fig. S6. TIMP-1 levels in HSF cells after treatment with control, TIMP-1 ASO and scramble DNA transferred with liposome 2000 as determined by qRT-PCR.



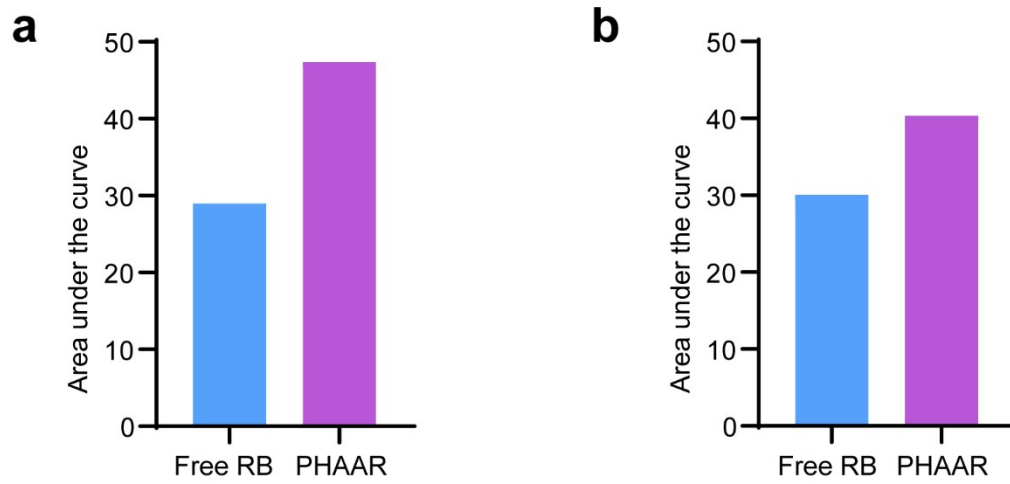

Fig. S7. *In vitro* quantification of fluorescence penetration by Franz penetration cell assay (a) and topical application by smearing (b) below the epidermis through AUC.

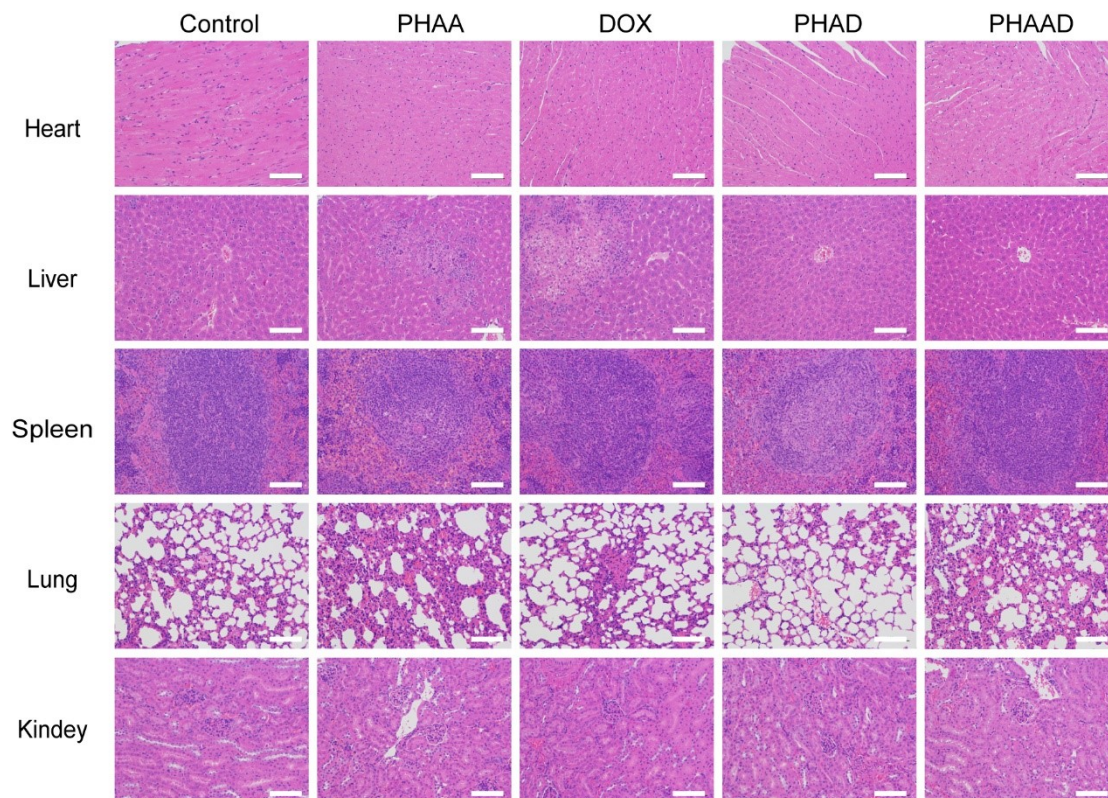

Fig. S8. HE images of the heart, liver, spleen, lung and kidney of mice treated with cream, PHAA nanoparticles cream, free DOX cream, PHAD nanoparticles cream and PHAAD nanoparticles cream, scale bar: 50 µm.
